# Supplementary material for: Elovanoids Counteract Inflammatory Signaling, Autophagy, Endoplasmic Reticulum Stress, and Senescence Gene Programming in Human Nasal Epithelial Cells Exposed to Allergens
Source: MDPI journal article supplement (doi:10.3390/pharmaceutics14010113), 2022-01-04
Supplement: s1 [file s1]

# Supplementary Materials: Elovanooids Counteract Inflammatory Signaling, Autophagy, Endoplasmic Reticulum Stress, and Senescence Gene Programming in Human Nasal Epithelial Cells Exposed to Allergens

Alfredo Resano, Surjyadipta Bhattacharjee, Miguel Barajas, Khanh V. Do, Roberto Aguado-Jiménez, David Rodríguez, Ricardo Palacios and Nicolás G. Bazán

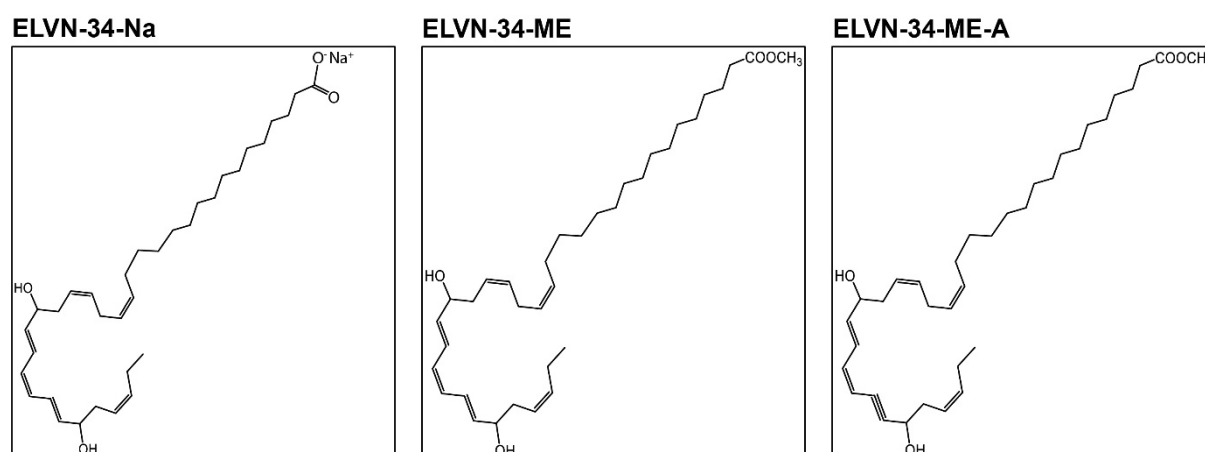

**Figure S1. Structures of Elovanooids (ELV).** ELVN-34:6 Na, ELVN-34:6 Me, and ELVN-34:6 Me-A at (500 nM) were used for experiments in this study.

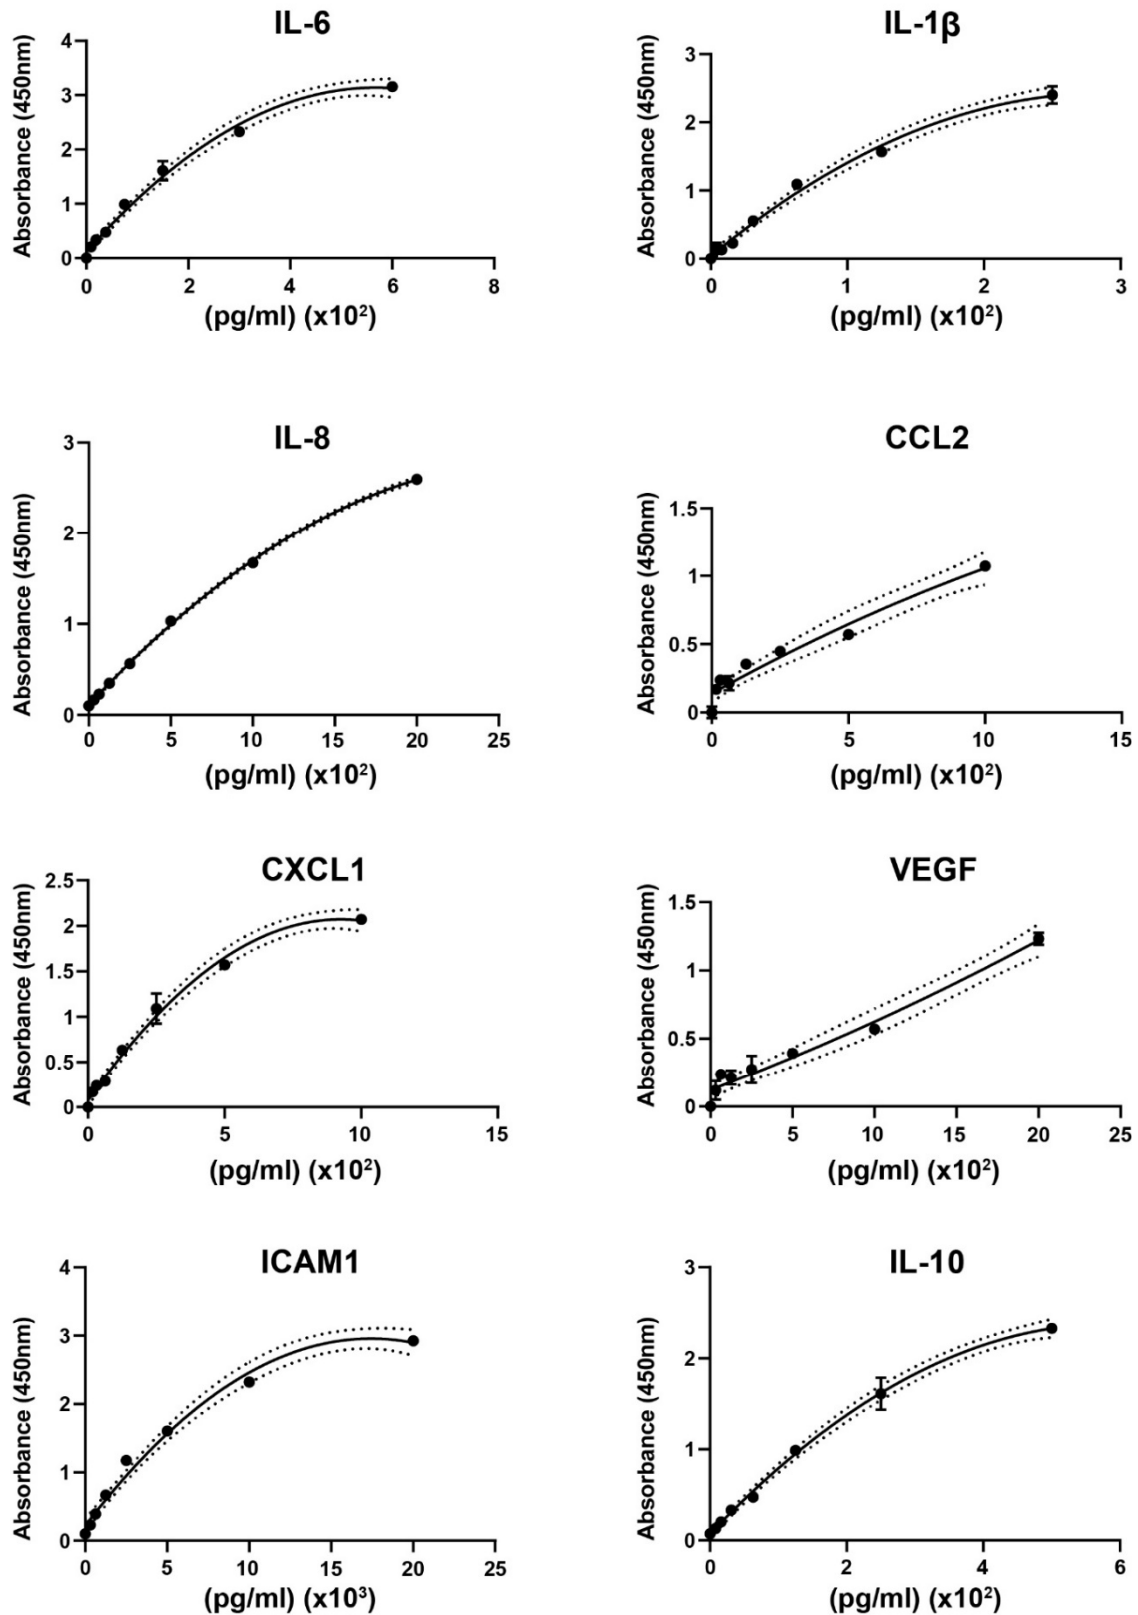

**Figure S2. ELISA Standard curves.** For the ELISA assays mentioned in this study, the standard curves for each assay are given above.

**Table S1.** List of primers used in the study.

| Protein              | Gene Name                      | Forward Sequence         | Reverse Sequence         |
|----------------------|--------------------------------|--------------------------|--------------------------|
| ATG3                 | <i>Atg3</i>                    | GATGGCGGATGGGTAGATACA    | TCTTCACATAGTGCTGAGCAATC  |
| ATG5                 | <i>Atg5</i>                    | AGAAGCTGTTTCGTCCTGTGG    | AGGTGTTTCCAACATTGGCTC    |
| ATG7                 | <i>Atg7</i>                    | ATGATCCCTGTAACTTAGCCCA   | CACGGAAGCAAACAACCTCAAC   |
| Beclin-1             | <i>Becn1</i>                   | GGTGTCTCTCGCAGATTCATC    | TCAGTCTTCGGCTGAGGTTCT    |
| p62                  | <i>Nup62</i>                   | CCTTCCAACCAGCCACAAGTAC   | CGAAGCAAGAGTCGCTGTITCCA  |
| ATF6                 | <i>Atf6</i>                    | GACTCACCCATCCGAGTTGTG    | CTCCCAGTCTTCATCTGGTCC    |
| CHOP                 | <i>Aff4</i>                    | CTGGAAGCCTGGTATGAGGAT    | CAGGGTCAAGAGTAGTGAAGGT   |
| IRE1                 | <i>Ern1</i>                    | CCGAACGTGATCCGCTACTTCT   | CGCAAAGTCCTTCTGCTCCACA   |
| MMP8                 | <i>Mmp8</i>                    | AATCCTTGCCCATGCCTTTCAACC | CCAAATTCATGAGCAGCCACGAGA |
| MMP2                 | <i>Mmp2</i>                    | CCTTAAAAGTATGGAGCGACGTCA | AGCGTTCCTACTTTACGCG      |
| MMP9                 | <i>Mmp9</i>                    | ACGACATAGACGGCATCCAGTATC | AGGTATAGTGGGACACATAGTGGG |
| MMP3                 | <i>Mmp3</i>                    | ACCAACCTATTCCTGGTTGCTGCT | ATGGAAACGGGACAAGTCTGTGGA |
| MMP12                | <i>Mmp12</i>                   | TAGAAGCAACTGGGCAACTGGACA | ACCGCTTCATCCATCTTGACCTCT |
| TIMP1                | <i>Tipm1</i>                   | GGAGAGTGTCTGCGGATACTTC   | GCAGGTAGTGATGTGCAAGAGTC  |
| TIMP2                | <i>Tipm2</i>                   | ACCCTCTGTGACTTCATCGTGC   | GGAGATGTAGCACGGGATCATG   |
| p21 <sup>CIP</sup>   | <i>Cdkn1a</i>                  | TGTCCGTCAGAACCCATGC      | AAAGTCGAAGTTCCATCGCTC    |
| p16 <sup>INK4a</sup> | <i>Cdkn2a</i>                  | GGGGGCACCAGAGGCAGT       | GGTTGTGGCGGGGGCAGTT      |
| p27 <sup>KIP</sup>   | <i>Cdkn1B</i>                  | TAATTGGGGCTCCGGCTAACT    | TGCAGGTGCTTCCTTATTCC     |
| p53                  | <i>Trp53</i>                   | CCCCTCCTGGCCCCTGTCATCTTC | GCAGCGCCTCACAACCTCCGTCAT |
| IL-1 $\alpha$        | <i>Il-1<math>\alpha</math></i> | TGTATGTGACTGCCCAAGATGAAG | AGAGGAGGTTGGTCTCACTACC   |
| IL-6                 | <i>Il-6</i>                    | CTGCAAGAGACTTCCATCCAG    | AGTGGTATAGACAGGTCTGTTGG  |
| IL-1 $\beta$         | <i>Il-1<math>\beta</math></i>  | AGCTACGAATCTCCGACCAC     | CGTTATCCCATGTGTCGAAGAA   |
| ACTB                 | <i>ActB</i>                    | AGCCTCGCCTTTGCCGA        | CTGGTGCCTGGGGCG          |
| GAPDH                | <i>Gapdh</i>                   | TGGACCTGACCTGCCGTCTA     | CCCTGTTGCTGTAGCCAAATTC   |
